# Supplementary material for: A Ru3+-functionalized-NMOF nanozyme as an inhibitor and disaggregator of β-amyloid aggregates
Source: Royal Society of Chemistry journal article supplement (doi:10.1039/d4tb01313a), 2024-01-01
Supplement: d4tb01313a1.pdf [file d4tb01313a1.pdf]

## Supporting Information

### A Ru<sup>3+</sup>-Functionalized-NMOF Nanozyme as an Inhibitor and Disaggregator for $\beta$ -Amyloid Aggregates

Wan-Chun Luo<sup>a</sup>, Li-Na Bao<sup>a</sup>, Yu Zhang<sup>a</sup>, Zi-Tong Zhang<sup>a</sup>, Xi Li<sup>a</sup>, Meng-Meng Pan<sup>a</sup>, Jin-Tao Zhang<sup>a</sup>, Kun Huang<sup>a,\*</sup>, Xu Yu<sup>a,\*</sup>, Li Xu<sup>a,\*</sup>

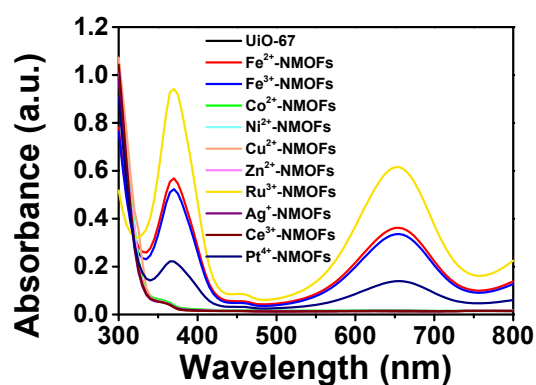

**Figure S1.** The absorption spectra corresponding to the oxidized TMB generated by a series of M<sup>n+</sup>-NMOFs with H<sub>2</sub>O<sub>2</sub>.

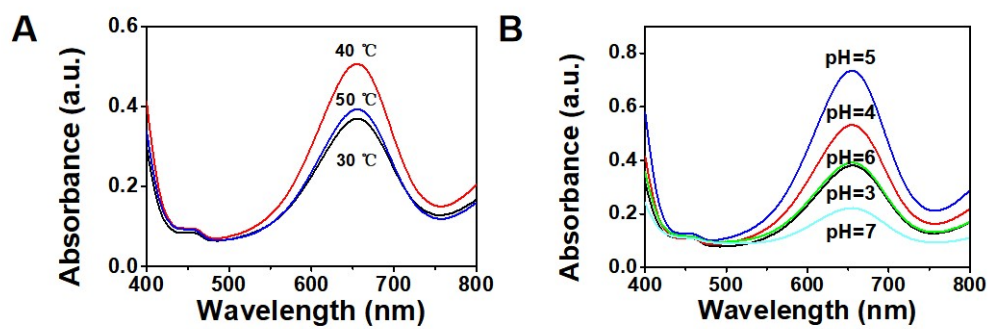

**Figure S2.** (A) The absorbance of TMB in the presence of Ru<sup>3+</sup>-NMOF + H<sub>2</sub>O<sub>2</sub> at 30, 40 and 50 °C. (B) The absorbance of TMB in the presence of Ru<sup>3+</sup>-NMOF + H<sub>2</sub>O<sub>2</sub> in HAcO-NaAcO buffer (50 mM, pH=3-7).

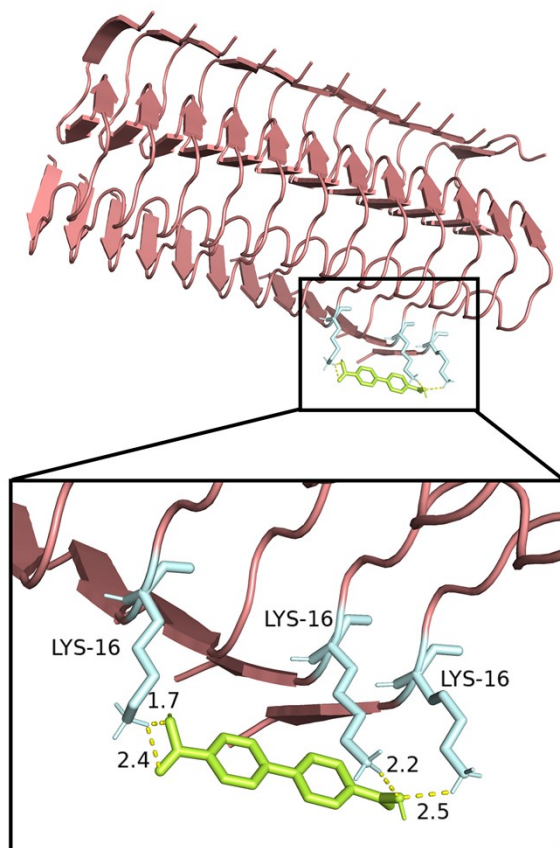

**Figure S3.** Molecular docking of 2,2'-bipyridyl-4,4'-dicarboxylic acid and A $\beta$  fibril.

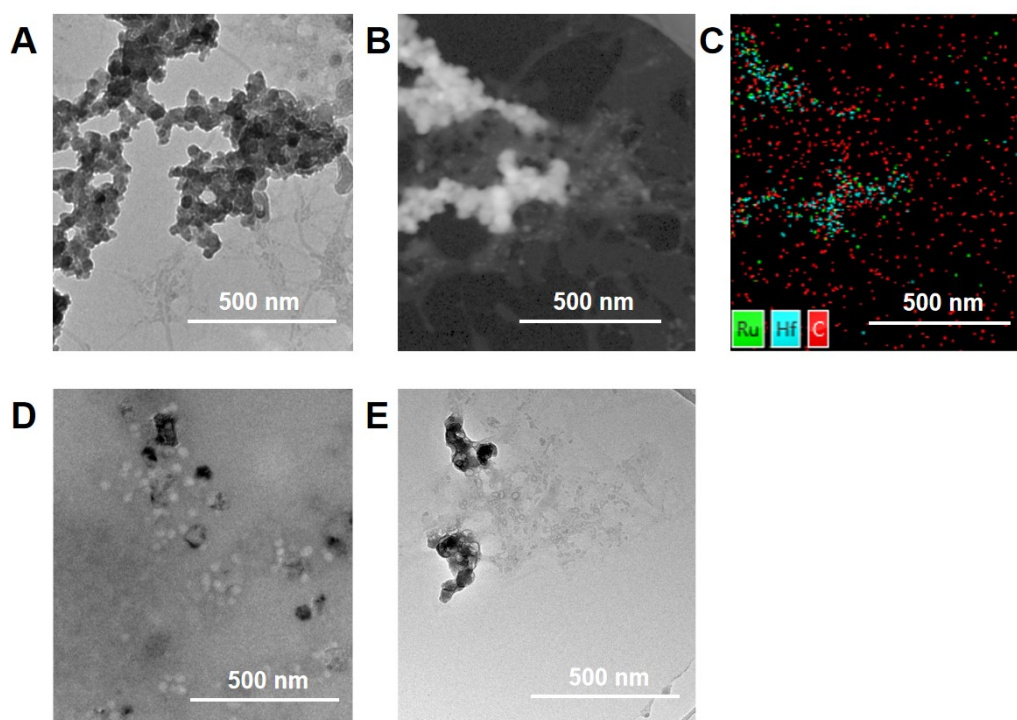

**Figure S4.** (A) The TEM images of Ru<sup>3+</sup>-NMOF and A $\beta$  fibrils. (B) TEM dark field of Ru<sup>3+</sup>-NMOF and A $\beta$  fibrils. (C) The element mapping corresponding to the K-edge signal of Ru<sup>3+</sup>-NMOF and A $\beta$  fibrils. (D) The TEM images of the product of Ru<sup>3+</sup>-NMOF and A $\beta$  in the inhibition test. (E) The TEM images of the product of Ru<sup>3+</sup>-NMOF and A $\beta$  in the disaggregation test.

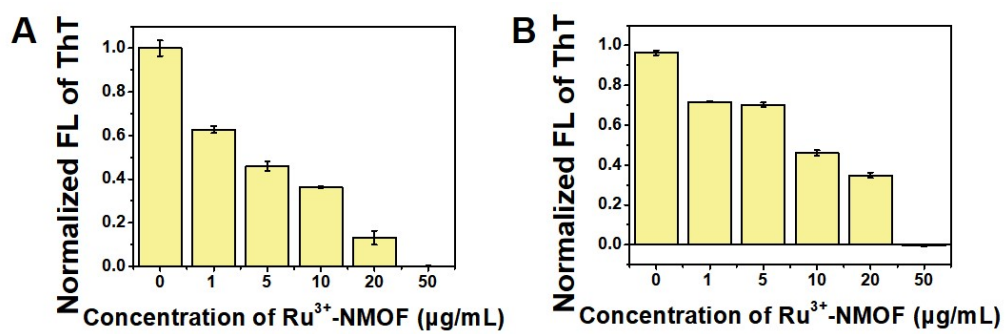

**Figure S5.** (A) The ThT assay of the final A $\beta$  products in presence of Ru<sup>3+</sup>-NMOF (1-50  $\mu$ g/mL) + H<sub>2</sub>O<sub>2</sub> (1 mM) in the inhibition test. (B) The ThT assay of A $\beta$  fibrils treated by Ru<sup>3+</sup>-NMOF (1-50  $\mu$ g/mL) + H<sub>2</sub>O<sub>2</sub> (1 mM) in the disaggregation test.

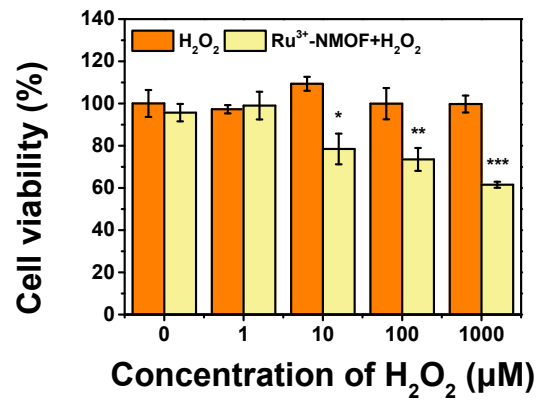

**Figure S6.** Cell viability in the presence of 1-1000  $\mu\text{M}$  of  $\text{H}_2\text{O}_2$  with and without 10  $\mu\text{g}/\text{mL}$  of  $\text{Ru}^{3+}$ -NMOF.

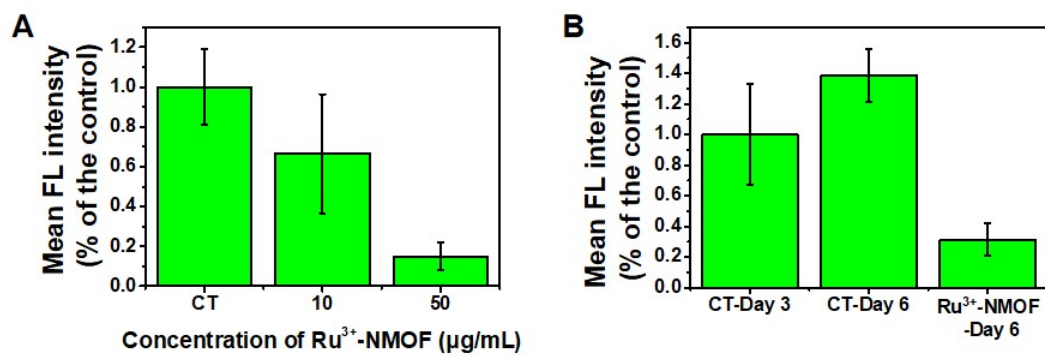

**Figure S7.** (A) The mean fluorescence intensity of CL2120 treated by Ru<sup>3+</sup>-NMOF (10 or 50 µg/mL) for inhibiting the aggregation of A $\beta$ . (B) The mean fluorescence intensity of CL2120 treated by Ru<sup>3+</sup>-NMOF (10 µg/mL) for disaggregating A $\beta$  fibrils.

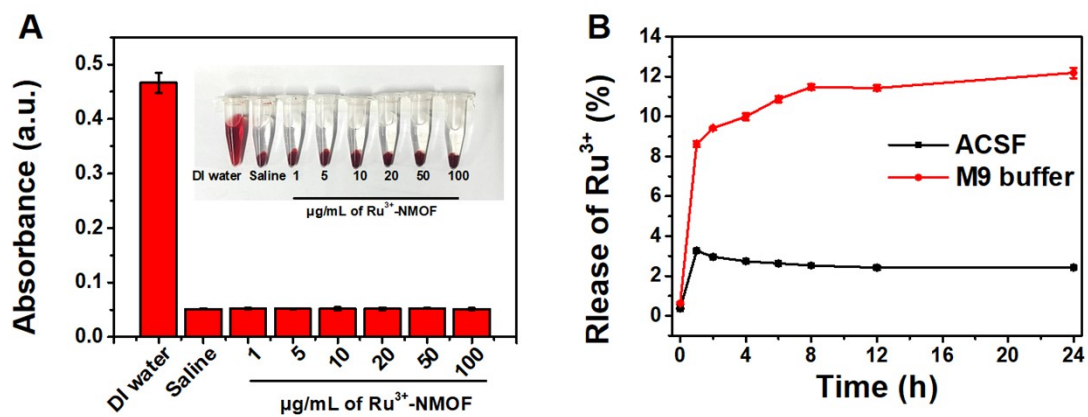

**Figure S8.** (A) The absorbance ( $\lambda=540$  nm) of 5% blood cells with deionized water, saline, and concentrations of  $\text{Ru}^{3+}$ -NMOF (1, 5, 10, 20, 50, 100  $\mu\text{g/mL}$ ) in hemolysis test. Insert: the photos corresponding to the groups as noted. (B) The release of  $\text{Ru}^{3+}$  from  $\text{Ru}^{3+}$ -NMOF (100  $\mu\text{g/mL}$ ) at 0, 1, 2, 4, 6, 8, 12, 24 h in ACSF and M9 buffer.
